# Supplementary material for: Longitudinal Language-Model Reasoning Enables Automated Labeling of Lung Cancer Recurrence from Unstructured Clinical Records
Source: Research Square preprint supplement (doi:10.21203/rs.3.rs-9550278/v1), 2026-05-21
Supplement: Supplementary file 1 [file 832bbcc74fef9bf5ec79a62e.pdf]

## Supplementary Material

PRD denotes patient-level recurrence detection; TEL denotes temporal event localization. Values are reported as percentages unless otherwise indicated. 95% confidence intervals are calculated for PRD accuracy, PRD F1, and TEL F1. Classification differences were evaluated using paired McNemar tests for PRD and TEL. Temporal differences were evaluated using paired Wilcoxon signed-rank tests on MAE. All quantitative experiments were conducted using the ablation cohort (GT2, n=398) unless otherwise stated.

## Appendix A Text Modalities

**Table A1: Characteristics and longitudinal availability of unstructured EHR modalities.** Per modality, we report patient-level coverage within the study cohort, median longitudinal coverage (days between first and last note per patient), and note availability within  $\pm 90$  days of confirmed recurrence among REC patients. Coverage metrics were calculated after application of inclusion and exclusion criteria.

| Code | File                             | Description / Definition                                                                                                                                                                         | Patient coverage | Period coverage<br>(days, median) | REC window coverage<br>(90 days) |
|------|----------------------------------|--------------------------------------------------------------------------------------------------------------------------------------------------------------------------------------------------|------------------|-----------------------------------|----------------------------------|
| VIS  | Visit Summary (Ambulatory Notes) | Clinician-authored encounter summaries including reason for visit, history of present illness, review of systems, vitals, assessment and plan, care instructions, and medication reconciliation. | 96.20%           | 2675                              | 86.12%                           |
| PRG  | Progress Reports                 | Inpatient progress documentation capturing interval clinical updates, including perioperative, emergency, nursing, or specialty-specific notes.                                                  | 97.51%           | 2702.5                            | 89.95%                           |
| PUL  | Pulmonary Reports                | Specialty reports containing pulmonary function test interpretations and impressions, including spirometry, lung volumes, and walk tests.                                                        | 20.97%           | 0                                 | 11.00%                           |
| DIS  | Discharge Summary                | End-of-hospitalization summaries documenting admission and discharge dates, hospital course, patient status, follow-up plans, and medication lists. Content may be partially templated.          | 96.54%           | 290.5                             | 55.02%                           |
| RAD  | Radiology Notes                  | Narrative imaging reports structured into technique, comparison, findings, and impression sections for CT, PET, MRI, and other imaging studies.                                                  | 99.46%           | 2637                              | 97.13%                           |
| LNO  | Longitudinal Notes               | Legacy ambulatory notes authored in the Longitudinal Medical Record (LMR) system. Content varies and may include inpatient or outpatient documentation prior to EPIC transition.                 | 63.33%           | 346                               | 11.48%                           |
| HNP  | History of Present Illness       | Structured longitudinal health maintenance data including immunizations, vital signs, physical findings, and related preventive care information.                                                | 91.18%           | 520                               | 61.72%                           |
| OPN  | Operative Notes                  | Narrative procedural documentation including indications, intraoperative findings, specimens, blood loss, condition at end of procedure, and follow-up plans.                                    | 96.98%           | 573                               | 72.25%                           |
| END  | Endoscopy                        | Procedure reports documenting indications, findings, impression, and recommendations from endoscopic examinations.                                                                               | 42.27%           | 454                               | 3.83%                            |
| PAT  | Pathology Reports                | Diagnostic reports including specimen description, adequacy, histopathologic interpretation, and final diagnosis.                                                                                | 97.46%           | 1231                              | 80.38%                           |

## Appendix B Dataset Characteristics

**Table B2: Cohort demographics across ground truth datasets.**

| Characteristic              | GT1 ( $n = 38$ ) | GT2 ( $n = 398$ ) | surgical cohort ( $n = 2,065$ ) |
|-----------------------------|------------------|-------------------|---------------------------------|
| <i>Age (years)</i>          |                  |                   |                                 |
| Mean (SD)                   | 75.97 (8.25)     | 74.32 (9.27)      | 73.68 (9.84)                    |
| Median [Range]              | 75.5 [56–93]     | 75.0 [34–98]      | 74.0 [23–99]                    |
| <i>Age groups (%)</i>       |                  |                   |                                 |
| 30–55                       | 0.0%             | 3.25%             | 3.83%                           |
| 55–70                       | 18.42%           | 24.50%            | 25.71%                          |
| $\geq 70$                   | 81.58%           | 72.25%            | 70.31%                          |
| <i>Sex (%)</i>              |                  |                   |                                 |
| Female                      | 63.16%           | 61.75%            | 61.36%                          |
| Male                        | 36.84%           | 38.25%            | 38.64%                          |
| <i>Race / Ethnicity (%)</i> |                  |                   |                                 |
| White                       | 89.47%           | 91.25%            | 88.47%                          |
| Black                       | 5.26%            | 1.75%             | 2.91%                           |
| Asian                       | 0.00%            | 2.75%             | 3.87%                           |
| Other / Unknown             | 5.26%            | 4.25%             | 4.75%                           |
| Recurrence prevalence       | 50.0%            | 26.75%            | 12.2%                           |

## Model Benchmarking

The evaluated models were [Llama-3.1-8B-Instruct](#) (Meta, 8B parameters) [61], an instruction-tuned general-purpose model with strong structured output compliance; [Mistral-NeMo-Instruct-2407](#) (Mistral AI, 12B parameters) [62], a multilingual model developed in collaboration with NVIDIA featuring a 128k token context window and quantization-aware training; [Phi-4-mini-Instruct](#) (Microsoft, 3.8B parameters) [63], a compact model trained on reasoning-rich synthetic data representing the smallest memory footprint in the candidate set; [MedGemma-4B-IT](#) (Google, 4B parameters) [64], a medically specialized vision-language model built on Gemma 3 4B and fine-tuned on medical image-text pairs, evaluated in text-only mode; and four members of the Qwen3 family (Alibaba Cloud) [65], specifically [Qwen3-4B-Instruct-2507](#) (4B), [Qwen3-4B-Thinking-2507](#) (4B), [Qwen3-8B](#) (8B), and [Qwen3-30B-A3B-Instruct-2507](#) (30B).

**Table B3: Open-source language model benchmark on Lung-RADS category extraction from radiology reports.**

Schema adherence reflects the proportion of model outputs conforming to the required JSON output structure. Hallucination rate reflects the proportion of outputs asserting categorical values absent from the source text. Lung-RADS accuracy reflects agreement with deterministic regular-expression-derived ground-truth labels. Latency and throughput were measured under matched on-premise hardware conditions. The selected model (Qwen3-4B-Instruct) is shown in bold.

| Model                         | Params (B) | Schema adherence (%) | Hallucination rate (%) | Lung-RADS accuracy (%) | Mean latency (sec) | Mean tokens / sec | GPU memory used (MB) |
|-------------------------------|------------|----------------------|------------------------|------------------------|--------------------|-------------------|----------------------|
| llama-3.1-8b-instruct         | 8          | 96.36                | 25.45                  | 100                    | 1.85               | 395.20            | 44594.65             |
| medgenma-4b-it                | 4          | 0                    | 0                      | N/A                    | 278.96             | 9.16              | 1                    |
| mistral-nemo-instruct-2407    | 12         | 96.36                | 30.91                  | 100                    | 2.21               | 318.63            | 44455.02             |
| Phi-3-mini-Instruct           | 3.8        | 0                    | 45.45                  | N/A                    | 2.85               | 242.47            | 45162.36             |
| <b>Qwen3-4B-Instruct-2507</b> | <b>4</b>   | <b>96.36</b>         | <b>9.09</b>            | <b>100</b>             | <b>2.57</b>        | <b>283.00</b>     | <b>44697.06</b>      |
| Qwen3-4B-Thinking-2507        | 4          | 0                    | 25.45                  | N/A                    | 9.16               | 104.45            | 45423.83             |
| Qwen3-8B                      | 8          | 0                    | 3.64                   | N/A                    | 10.52              | 90.52             | 43886.57             |
| Qwen3-30B-A3B-Instruct-2507   | 30         | 96.36                | 14.55                  | 100                    | 7.44               | 96.32             | 44929.84             |

## Appendix C Pipeline Evaluation

**Table C4: REGEX classification performance by modality and reasoning stage.**

| Modality | Stage            | PRD                  |                      | TEL       |        |                      |                 |
|----------|------------------|----------------------|----------------------|-----------|--------|----------------------|-----------------|
|          |                  | Accuracy<br>(95% CI) | F1<br>(95% CI)       | Precision | Recall | F1<br>(95% CI)       | MAE<br>(months) |
| VIS      | Note-level       | 38.3%<br>(33.6–43.2) | 43.9%<br>(38.0–49.7) | 21.9%     | 72.1%  | 33.6%<br>(29.5–37.9) | 1.09            |
|          | Global Reasoning | 35.8%<br>(31.2–40.6) | 43.5%<br>(37.6–49.0) | 17.0%     | 51.3%  | 25.6%<br>(21.0–30.3) | 1.90            |
| PRG      | Note-level       | 33.2%<br>(28.8–38.0) | 43.3%<br>(37.4–48.8) | 19.3%     | 75.0%  | 30.7%<br>(27.3–34.6) | 1.25            |
|          | Global Reasoning | 33.2%<br>(28.8–38.0) | 43.0%<br>(37.2–48.5) | 23.9%     | 63.5%  | 34.7%<br>(30.0–39.7) | 1.40            |

### C.1 Statistical evaluation per modality

**Table C5: Pairwise statistical comparison of NLE vs. GR per modality.** Statistical significance was defined using a Bonferroni-adjusted threshold of  $\alpha = 0.0167$  to account for 3 pairwise comparisons. **\*\*** Denotes significance at the adjusted level ( $P < 0.0167$ ), **\*** Indicates nominal significance ( $P < 0.05$ ) that did not survive Bonferroni correction.

| Test    | $\Delta$ MAE | Wilcoxon $W$ | MAE $P$ -value | PRD $P$ -value | TEL $P$ -value |
|---------|--------------|--------------|----------------|----------------|----------------|
| PRG     | 0.7          | 536.5        | 0.0001**       | 0.07           | 0.002 **       |
| VIS     | 0.58         | 196.0        | 0.001**        | 0.21           | 1.0            |
| VIS+PRG | 1.09         | 322.0        | 4.13e-07**     | 0.06           | 0.004**        |

## C.2 Inference repeatability

**Table C6: Pairwise statistical comparison of repeated runs (global reasoning, PRG)** No comparison reached statistical significance.

| Test           | Wilcoxon $W$ | MAE $P$ -value | $\Delta$ MAE | PRD $P$ -value | TEL $P$ -value |
|----------------|--------------|----------------|--------------|----------------|----------------|
| Run 1 vs Run 2 | 40.0         | 0.696          | -0.06        | 0.608          | 0.267          |
| Run 1 vs Run 3 | 109.5        | 0.084          | +0.05        | 0.207          | 0.185          |
| Run 2 vs Run 3 | 6.5          | 0.098          | +0.11        | 0.774          | 1.000          |

**Table C7: Run-to-run repeatability across three independent executions (PRG)**

| Stage |                  | PRD                  |                   | TEL       |        |                   |
|-------|------------------|----------------------|-------------------|-----------|--------|-------------------|
|       |                  | Accuracy<br>(95% CI) | F1<br>(95% CI)    | Precision | Recall | F1<br>(95% CI)    |
| Run 1 | Note-level       | 80.5% (76.3–84.1)    | 70.9% (65.1–76.9) | 57.5%     | 89.9%  | 69.8% (62.8–76.7) |
|       | Global reasoning | 82.1% (78.3–85.8)    | 72.9% (66.4–78.7) | 68.9%     | 96.3%  | 80.3% (75.3–85.5) |
| Run 2 | Note-level       | 79.9% (75.7–83.5)    | 69.0% (62.2–75.2) | 60.1%     | 88.5%  | 71.6% (65.2–78.4) |
|       | Global reasoning | 81.7% (77.6–85.2)    | 70.7% (64.0–76.8) | 70.3%     | 87.4%  | 77.9% (71.0–84.8) |
| Run 3 | Note-level       | 80.9% (76.8–84.5)    | 70.1% (63.3–76.2) | 59.9%     | 90.4%  | 72.0% (66.2–78.3) |
|       | Global reasoning | 82.2% (78.1–85.6)    | 70.8% (64.0–77.0) | 69.2%     | 92.0%  | 79.0% (73.0–85.2) |

## C.3 Inference model-temperature impact

**Table C8: Classification performance across sampling temperatures (global reasoning, PRG).**

| Temp | Stage            | PRD                      |                      | TEL           |            |                      |
|------|------------------|--------------------------|----------------------|---------------|------------|----------------------|
|      |                  | PRD Accuracy<br>(95% CI) | PRD F1<br>(95% CI)   | TEL Precision | TEL Recall | TEL F1<br>(95% CI)   |
| 1.0  | Note-level       | 79.9%<br>(75.7–83.5)     | 69.2%<br>(62.5–75.3) | 66.4%         | 92.4%      | 77.3%<br>(71.1–83.5) |
|      | Global Reasoning | 82.9%<br>(78.9–86.3)     | 72.6%<br>(66.1–78.6) | 67.9%         | 86.7%      | 76.2%<br>(69.3–82.9) |
| 0.7  | Note-level       | 78.1%<br>(73.8–81.9)     | 66.4%<br>(59.4–72.7) | 60.6%         | 94.0%      | 73.7%<br>(66.9–80.7) |
|      | Global Reasoning | 79.9%<br>(75.4–83.3)     | 68.3%<br>(75.7–83.5) | 69.5%         | 91.0%      | 78.8%<br>(72.7–84.8) |
| 0.1  | Note-level       | 80.5%<br>(76.3–84.1)     | 70.9%<br>(65.1–76.9) | 57.5%         | 89.9%      | 69.8%<br>(62.8–76.7) |
|      | Global Reasoning | 82.3%<br>(78.3–85.8)     | 72.9%<br>(66.4–78.7) | 68.9%         | 96.3%      | 80.3%<br>(75.3–85.5) |

**Table C9: Pairwise statistical comparison of sampling temperatures (global reasoning, PRG).** Statistical significance was defined using a Bonferroni-adjusted threshold of  $\alpha = 0.0167$  to account for 3 pairwise comparisons. **\*\*** Denotes significance at the adjusted level ( $P < 0.0167$ ), **\*** Indicates nominal significance ( $P < 0.05$ ) that did not survive Bonferroni correction.

| Test            | $\Delta$ MAE | Wilcoxon $W$ | MAE $P$ -value | PRD $P$ -value | TEL $P$ -value |
|-----------------|--------------|--------------|----------------|----------------|----------------|
| Temp 1.0 vs 0.7 | -0.01        | 79.0         | 0.316          | 0.026*         | 1.0            |
| Temp 1.0 vs 0.1 | -0.06        | 167.0        | 0.822          | 0.35           | 0.011**        |
| Temp 0.7 vs 0.1 | -0.05        | 148.0        | 0.316          | 0.609          | 0.003**        |

#### C.4 Inference NLE-prompt impact

**Table C10: Note-level extraction performance across prompt variants (PRG).**

| Prompt           | PRD                  |                      | TEL       |        |                      |
|------------------|----------------------|----------------------|-----------|--------|----------------------|
|                  | Accuracy<br>(95% CI) | F1<br>(95% CI)       | Precision | Recall | F1<br>(95% CI)       |
| Base             | 80.5%<br>(76.3–84.1) | 70.9%<br>(65.1–76.9) | 57.7%     | 89.9%  | 69.8%<br>(62.8–76.7) |
| CoT              | 79.4%<br>(75.2–83.1) | 67.2%<br>(60.2–73.6) | 58.1%     | 90.9%  | 70.9%<br>(63.4–78.7) |
| ToT              | 72.9%<br>(68.3–77.0) | 57.1%<br>(49.4–64.2) | 43.2%     | 82.4%  | 56.7%<br>(50.0–64.2) |
| Few-shot         | 80.9%<br>(76.8–84.5) | 69.8%<br>(62.9–76.0) | 63.8%     | 92.2%  | 75.4%<br>(69.4–81.4) |
| Multi-class JSON | 78.6%<br>(74.4–82.4) | 63.2%<br>(55.6–70.1) | 54.2%     | 89.7%  | 67.5%<br>(60.6–75.2) |
| Schema-First     | 73.6%<br>(69.0–77.6) | 59.8%<br>(52.4–66.7) | 48.1%     | 83.5%  | 61.0%<br>(54.3–68.5) |
| Task Sequencing  | 71.6%<br>(67.0–75.8) | 59.2%<br>(52.1–65.9) | 46.5%     | 81.4%  | 59.2%<br>(52.8–65.6) |
| Merge Techniques | 74.9%<br>(70.4–78.9) | 62.7%<br>(56.5–69.9) | 46.7%     | 79.8%  | 59.0%<br>(52.4–65.9) |

**Table C11: Pairwise statistical comparison across note-level prompt variants (PRG).** Significance thresholds were adjusted for seven pairwise comparisons against the manually optimized base configuration. \*\* Denotes statistical significance after Bonferroni correction ( $\alpha = 0.0071$ ); \* indicates nominal significance ( $P < 0.05$ ) that did not survive correction. Values without notation are non-significant ( $P \geq 0.05$ ).

| Comparison               | PRD $P$ -value | TEL $P$ -value |
|--------------------------|----------------|----------------|
| Base vs CoT              | 0.665          | 0.281          |
| Base vs ToT              | 0.001**        | < 0.001 **     |
| Base vs Few-shot         | 0.892          | 0.856          |
| Base vs Multi-class JSON | 0.532          | 0.001**        |
| Base vs Schema-First     | 0.004**        | 0.002**        |
| Base vs Task Sequencing  | < 0.001 **     | 0.004**        |
| Base vs Merge Techniques | 0.013*         | 0.001**        |

## C.5 Inference GR-prompt impact

**Table C12: Global reasoning performance across prompt variants (PRG).**

| Prompt           | PRD                  |                      | TEL       |        |                      |
|------------------|----------------------|----------------------|-----------|--------|----------------------|
|                  | Accuracy<br>(95% CI) | F1<br>(95% CI)       | Precision | Recall | F1<br>(95% CI)       |
| Base             | 82.3%<br>(78.0–85.5) | 72.9%<br>(66.4–78.7) | 68.9%     | 96.3%  | 80.3%<br>(75.3–85.5) |
| CoT              | 80.6%<br>(76.4–84.2) | 70.5%<br>(63.8–76.4) | 63.5%     | 93.4%  | 75.6%<br>(69.7–81.7) |
| ToT              | 79.3%<br>(75.0–83.0) | 69.4%<br>(62.8–75.4) | 60.7%     | 92.5%  | 73.3%<br>(67.1–79.5) |
| Task Sequencing  | 80.8%<br>(76.6–84.4) | 71.0%<br>(64.4–76.8) | 63.5%     | 94.4%  | 75.9%<br>(70.1–82.0) |
| Schema-First     | 81.6%<br>(77.4–85.1) | 72.0%<br>(65.6–77.9) | 66.0%     | 89.8%  | 76.1%<br>(70.4–82.0) |
| Merge Techniques | 81.3%<br>(77.2–84.8) | 71.8%<br>(65.3–77.6) | 66.9%     | 93.5%  | 78.0%<br>(72.2–83.9) |

**Table C13: Pairwise statistical comparison across global reasoning prompt variants (PRG).** Statistical significance was defined using a Bonferroni-adjusted threshold of  $\alpha = 0.01$  to account for five comparisons against the base configuration. **\*\*** Denotes significance at the adjusted level ( $P < 0.01$ ); **\*** indicates nominal significance ( $P < 0.05$ ) that did not survive Bonferroni correction.

| Comparison               | PRD $P$ -value | TEL $P$ -value |
|--------------------------|----------------|----------------|
| Base vs CoT              | 0.549          | 0.289          |
| Base vs ToT              | 0.031 *        | 0.180          |
| Base vs Task Sequencing  | 1.000          | 0.070          |
| Base vs Schema-First     | 0.344          | 0.375          |
| Base vs Merge Techniques | 0.219          | 0.375          |

## C.6 Expert adjudication and error analysis

**Table C14: Subcategory breakdown of adjudicated reason assignments among false-positive cases.** Detailed categorization of reviewed false-positive instances across registry misclassifications, model errors, and study limitations. Percentages are reported relative to all reviewed false-positive instances ( $n = 134$ ).

| Main category              | Subcategory                                        | Count (n) | Share of total (%) |
|----------------------------|----------------------------------------------------|-----------|--------------------|
| Model error                | Temporal grounding – note date substitution        | 16        | 11.94              |
|                            | Temporal grounding – reasoning step drift          | 8         | 5.97               |
|                            | Temporal grounding – reference misplacement        | 5         | 3.73               |
|                            | Reasoning error – duplicate event                  | 5         | 3.73               |
|                            | Reasoning error – certainty conflation             | 2         | 1.49               |
|                            | Reasoning error – disconfirmatory evidence failure | 2         | 1.49               |
| Registry misclassification | True positive                                      | 44        | 32.84              |
|                            | Missing imaging; text true positive                | 19        | 14.18              |
|                            | True positive (date correction)                    | 1         | 0.75               |
| Study limitation           | Domain knowledge boundary                          | 17        | 12.69              |
|                            | Duplicate ascertainment                            | 12        | 8.96               |
|                            | Note-quality limitation – typographic error        | 2         | 1.49               |
|                            | Ascertainment lag                                  | 1         | 0.75               |

**Table C15: Taxonomy of adjudicated categories and underlying failure mechanisms.** Subcategories are mapped to their corresponding error mechanisms. Model errors primarily reflect temporal grounding and reasoning failures, whereas registry misclassifications and study limitations arise from imperfections in structured labels, incomplete source material, or annotation constraints rather than incorrect model inference alone.

| Main category                                      | Subcategory                                                                                                 | Failure mode description                                                                                                                                                                                                                                                                                                 |
|----------------------------------------------------|-------------------------------------------------------------------------------------------------------------|--------------------------------------------------------------------------------------------------------------------------------------------------------------------------------------------------------------------------------------------------------------------------------------------------------------------------|
| Model error                                        | Temporal grounding – note date substitution                                                                 | Event was linked to the note date rather than the clinically relevant event date, often in conjunction with disconfirmation.                                                                                                                                                                                             |
|                                                    | Temporal grounding – reasoning step drift                                                                   | Current temporal information was contextual at the note level, but the final reasoning step strayed from the event to an incorrect date.                                                                                                                                                                                 |
|                                                    | Temporal grounding – reference misplacement                                                                 | Event date from the event was attributed to the wrong clinical event or episode (location/finding failure).                                                                                                                                                                                                              |
|                                                    | Reasoning error – duplicate event                                                                           | Previously identified occurrence evidence was incorrectly treated as new occurrence evidence than part of the same episode.                                                                                                                                                                                              |
|                                                    | Reasoning error – certainty conflation                                                                      | Significant or potential evidence was incorrectly labeled as confirmed occurrence despite event finding and timing.                                                                                                                                                                                                      |
| Reasoning error – disconfirmatory evidence failure | Negated evidence in the record was not incorporated, resulting in an unrepresented positive classification. |                                                                                                                                                                                                                                                                                                                          |
| Registry misclassification                         | True positive                                                                                               | Model prediction was clinically correct, but the reference registry label was incorrect.                                                                                                                                                                                                                                 |
| Study limitation                                   | Missing imaging; text true positive                                                                         | Model prediction was clinically correct, registry label was incorrect. IT evidence not available, substitution through clinical history.                                                                                                                                                                                 |
|                                                    | True positive (date correction)                                                                             | Model prediction is correct occurrence above from the register, but with a slight temporal difference to the true event.                                                                                                                                                                                                 |
|                                                    | Domain knowledge boundary                                                                                   | Disease classification falls outside the task scope or field of view, preventing meaningful occurrence assignment; classification was clinically defensible under ambiguity.                                                                                                                                             |
|                                                    | Duplicate ascertainment                                                                                     | A single structured occurrence episode was coded multiple times because separate coders each verified the occurrence criteria.                                                                                                                                                                                           |
| Study limitation                                   | Note-quality limitation – typographic error                                                                 | Errors in the source data, such as spelling/correction or multiple dates, propagated into model output despite otherwise reasonable interpretation.                                                                                                                                                                      |
|                                                    | Ascertainment lag                                                                                           | Annotation criteria require counterfactual related action, which eventually prohibits the earlier documented suspicion. Where documentation reflects only clinical suspicion or deferred action due to patient discontinuation, the pipeline correctly assigns SUSP rather than REC, diverging from registry REC labels. |
|                                                    | No available documentation                                                                                  | Evidence is documented in the record but absent from the related structured text labeling.                                                                                                                                                                                                                               |
|                                                    | Event date                                                                                                  | The pipeline anchors to the earliest radiologically event which precedes the registry record – when the difference exceeds the matching window the prediction goes unrepresented.                                                                                                                                        |

**Table C16: Performance comparison: registry-corrected versus unadjusted ground truth (VIS and PRG).** Bonferroni correction was not applied; a single pairwise comparison was performed per stage and modality. ★Statistically significant PRD improvement with corrected ground truth. TEL metrics were unchanged across all comparisons (no discordant pairs), confirming that temporal localization performance was unaffected by label correction.

| Mod | Stage            | GT         | PRD Accuracy<br>(95% CI) | PRD F1<br>(95% CI)   | TEL Precision | TEL Recall | TEL F1<br>(95% CI)   | PRD <i>P</i> -value | TEL <i>P</i> -value |
|-----|------------------|------------|--------------------------|----------------------|---------------|------------|----------------------|---------------------|---------------------|
| VIS | Note-level       | Unadjusted | 79.9%<br>(75.7-83.5)     | 69.0%<br>(63.9-76.5) | 60.1%         | 88.5%      | 71.6%<br>(65.2-78.4) | Ref                 | Ref                 |
|     |                  | Adjusted   | 81.7%<br>(77.6-85.2)     | 72.5%<br>(66.1-78.3) | 64.4%         | 88.9%      | 71.6%<br>(68.8-81.2) | 0.016★              | 1.000               |
|     | Global Reasoning | Unadjusted | 81.9%<br>(77.8-85.4)     | 70.7%<br>(64.0-76.8) | 70.3%         | 87.4%      | 77.9%<br>(71.0-84.8) | Ref                 | Ref                 |
|     |                  | Adjusted   | 86.9%<br>(83.3-89.9)     | 81.3%<br>(76.0-86.0) | 77.6%         | 88.6%      | 82.8%<br>(78.1-87.1) | < 0.001★            | 1.000               |
| PRG | Note-level       | Unadjusted | 80.5%<br>(76.3-84.1)     | 70.9%<br>(65.1-76.9) | 57.5%         | 89.9%      | 69.8%<br>(62.8-76.7) | Ref                 | Ref                 |
|     |                  | Adjusted   | 82.3%<br>(78.2-85.7)     | 74.3%<br>(67.1-79.0) | 61.1%         | 89.7%      | 72.7%<br>(66.5-79.1) | 0.016★              | 1.000               |
|     | Global Reasoning | Unadjusted | 82.3%<br>(78.3-85.8)     | 72.9%<br>(66.4-78.7) | 68.9%         | 96.3%      | 80.3%<br>(75.3-85.5) | Ref                 | Ref                 |
|     |                  | Adjusted   | 88.9%<br>(85.4-91.6)     | 84.6%<br>(79.8-88.9) | 76.4%         | 93.6%      | 84.1%<br>(80.0-88.2) | < 0.001★            | 1.000               |

## C.7 Inference demographic bias

**Table C17: Subgroup performance evaluation by sex, race, and age (global reasoning, PRG).** Power estimates reflect post-hoc analysis for detecting a 10 percentage-point difference in TEL F1 relative to the overall cohort reference value at  $\alpha = 0.05$  and 80% power. Minimum detectable effect (MDE) at 80% power is shown for each subgroup. Racial minority subgroups were substantially underpowered, with MDEs ranging from 25 to 32 percentage points; the absence of a detected performance disparity should not be interpreted as evidence of equitable performance across populations.

| Subgroup                 | N   | PRD Sens. | PRD Spec. | TEL F1 | TEL MAE | Power (10pp) | MDE 80% |
|--------------------------|-----|-----------|-----------|--------|---------|--------------|---------|
| Overall                  | 398 | 91.8%     | 79.0%     | 78.1%  | 0.62    | —            | —       |
| Female                   | 246 | 92.2%     | 78.0%     | 77.2%  | 0.64    | 0.57         | 13.0pp  |
| Male                     | 152 | 90.9%     | 80.5%     | 80.5%  | 0.58    | 0.57         | 12.8pp  |
| White / Caucasian        | 363 | 90.6%     | 79.3%     | 76.9%  | 0.55    | 0.24         | 21.7pp  |
| Black / African American | 7   | 100.0%    | 60.0%     | 100.0% | 1.50    | 0.09         | 32.4pp  |
| Asian                    | 11  | 100.0%    | 85.7%     | 80.0%  | 1.00    | 0.11         | 29.2pp  |
| Other / Unknown          | 17  | 100.0%    | 75.0%     | 88.9%  | 1.00    | 0.13         | 26.1pp  |
| Age 30–55                | 13  | 100.0%    | 90.0%     | 75.0%  | 0.67    | 0.12         | 27.8pp  |
| Age 55–70                | 98  | 95.0%     | 74.4%     | 74.5%  | 0.53    | 0.48         | 14.2pp  |
| Age $\geq 70$            | 287 | 90.8%     | 80.3%     | 79.1%  | 0.64    | 0.51         | 14.0pp  |

## Appendix D Methods

### D.1 Evaluation: PRD & TEL

---

**Algorithm 1:** Hierarchical Recurrence Evaluation and Clustering

---

**Input:** Ground Truth  $\mathcal{G}$ , Predictions  $\mathcal{P}$ , Threshold  $\tau = 3$  months  
**Output:** PRD and TEL  
Filter  $\mathcal{P}$  by  $\mathcal{G}_{\text{EMPI}}$  and remove events  $\leq T_{\text{early-post-surgery}}$ ;  
Censor  $\mathcal{P}$  beyond date of last registry contact  $t_{\text{last}}$ ;  
// Temporal Sliding-Window Clustering  
**Function** Cluster( $events, \tau$ ):  
    Sort events by month;  
    Group events into cluster  $C$  if  $\Delta t \leq \tau$ ;  
     $L_C \leftarrow$  hierarchical: REC  $\succ$  SUSP  $\succ$  NOREC  $\in C$  ;  
     $t_C \leftarrow$  median( $t \in C$ );  
    **return**  $\{C_1, C_2, \dots, C_n\}$ ;  
// TEL: Minimum Distance Assignment  
**foreach**  $TP$  Patient **do**  
     $C_{GT} \leftarrow$  Cluster( $\mathcal{G}_P, \tau$ );  
     $C_{pred} \leftarrow$  Cluster( $\mathcal{P}_P, \tau$ );  
    Perform greedy matching based on  $\min|t_{C_{GT}} - t_{C_{pred}}|$ ;  
    Classify unmatched  $C_{pred}$  as  $FP_{\text{Stage2}}$  if distance  $>$  Tolerance;  
**end**

---

### D.2 NLE output schema

**Fig. D1:** Structured JSON output schemas for the multi-class and binary Note-Level Extraction.

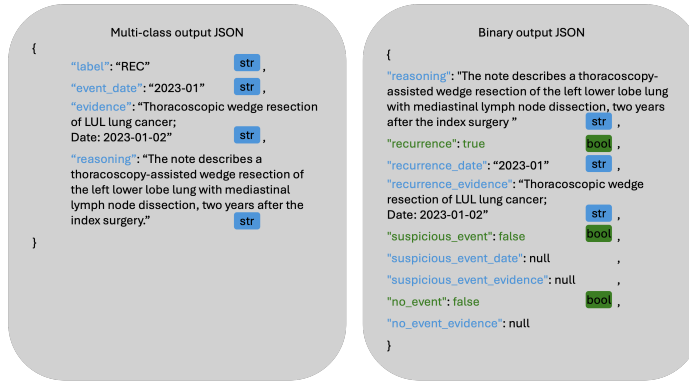

## Appendix E Operational Criteria, Decision Hierarchies, and Adjudication Rules

This section details the formal logic and operational definitions used for the automated extraction and longitudinal adjudication of lung cancer recurrence (REC), suspicious events (SUSP), and no evidence of recurrence (NOREC).

### E.1 Note-level extraction criteria

Individual clinical documents were classified based on five specific recurrence triggers ( $R_1 - R_5$ ) and three suspicious event triggers ( $S_1 - S_3$ ).

#### E.1.1 Confirmed REC triggers

A note is labeled as REC if at least one of the following is documented after the index surgery:

- **R1 (Definite PET):** PET imaging explicitly stating "definite" or "confirmed" recurrence.
- **R2 (Positive pathology):** Malignant biopsy (e.g., EBUS, CT-guided) or pathology report from lung tissue or hilar/mediastinal nodes.
- **R3 (Repeat surgery):** Subsequent lung resection (e.g., wedge, lobectomy) performed >2 months post-index surgery.
- **R4 (Explicit diagnosis):** Clinical statements of "recurrent lung cancer" or "metachronous primary".
- **R5 (Delivered Therapy):** Initiation of SBRT, new radiation, or systemic therapy (chemotherapy/immunotherapy) directed at a lung-specific lesion.

#### E.1.2 Suspicious event (SUSP) triggers

A note is labeled as SUSP if it describes clinical escalation without meeting REC gates:

- **S1 (Non-positive invasive workup):** Biopsies or pathology with "benign," "atypical," or "indeterminate" results.
- **S2 (Indeterminate PET):** FDG-avid findings described as "concerning," "favored," or "cannot exclude malignancy" without "definite" language.
- **S3 (Concrete escalation planning):** Explicit orders or scheduling for PET, biopsy, or surgery to evaluate a new finding (excluding routine surveillance CT).

### E.2 Decision hierarchies and hard constraints

To ensure specificity and handle the inherent noise of clinical documentation, the following hierarchy and constraints were applied:

- **CT-only rule:** Radiological findings alone (e.g., "enlarging nodule," "highly suspicious CT") **never** trigger REC or SUSP. CT findings are classified as NOREC unless followed by PET, biopsy, or treatment.

- **History vs. event:** Phrases such as "status post (s/p)" or "history of" do not trigger events unless they describe diagnostic/treatment actions occurring within the current clinical timeframe (within the year of the current note).
- **Anatomic Specificity:** REC is restricted to the thorax (lung regions or mediastinal nodes). Isolated distant metastases (e.g., brain, liver) without lung involvement are excluded from the REC label.
- **Temporal Buffers:** Any event occurring  $\leq 2$  months after the index surgery is treated as a synchronous primary or residual disease (NOREC).

### E.3 Global adjudication and reasoning

The global reasoning layer consolidates note-level extractions into a patient-level timeline using a three-phase workflow:

#### *Mandatory workflow*

**Phase A1 (Global Read):** All episodes and their supporting evidence are reviewed in full before any label is assigned, allowing formation of a coherent patient course across time.

**Phase A2 (Event Ledger):** All potential events are extracted into an internal ledger. The model must resolve relative time markers (e.g., "recent biopsy") to specific dated anchors. Any event that clearly refers to an already-anchored confirmed episode is marked HISTORY\_ONLY and is prohibited from generating a new episode.

**Phase B (Episode Adjudication):** Episodes are validated and repaired as follows:

- **Upgrade or downgrade:** An episode is upgraded to REC if a confirmation gate (see [E.1.1](#)) is met; downgraded to SUSP or NOEVENT if it is not.
- **Split:** A NOEVENT episode containing an escalation action within its interval is split at the earliest escalation month supported by evidence.
- **Merge:** Episodes describing the same lesion, workup chain, or treatment course are merged; the highest escalation month is retained as anchor.
